# Supplementary material
Source: HighWire-hosted journal article supplement (https://bmjopen.bmj.com/content/8/10/e018499)
Supplement: inline-supplementary-material-1 [file inline-supplementary-material-1.pdf]

Lungproforma

**Patient Name:** \_\_\_\_\_ **Patient No:** \_\_\_\_\_ **Date of Birth:** \_\_\_\_\_

**REPORTING PRO FORMA FOR CT STAGING: LUNG CANCER**

*(SECTIONS SHOWN IN BLUE ARE OPTIONAL)*

**TUMOUR**

Primary tumour: ☐ solid ☐ part solid / part GG ☐ entirely GG

☐ cavitating ☐ necrotic

☐ spiculated ☐ irregular ☐ lobulated

☐ air bronchograms

Located in: ☐ RUL apical seg ☐ RUL anterior seg ☐ RUL posterior seg

☐ RML medial seg ☐ RML lateral seg

☐ RLL apical basal seg ☐ RLL ant basal seg

☐ RLL lateral basal seg ☐ RLL posterior basal seg ☐ RLL medial basal seg

☐ LUL apicoposterior seg ☐ LUL anterior seg ☐ Lingula

☐ LLL apicobasal seg ☐ LLL anterior basal seg

☐ LLL lateral basal seg ☐ LLL posterior basal seg

Tumour dimensions: \_\_\_\_\_ x \_\_\_\_\_ x \_\_\_\_\_ mm

Tumour difficult to differentiate from adjacent consolidation ☐

Endobronchial disease: Present/absent ☐ Trachea ☐ main bronchus ☐ lobar  
☐ segmental ☐ subsegmental

Tumour locally invades: ☐ visceral pleura

☐ parietal pleura

- ☐ mediastinal fat
- ☐ mediastinal structures - ☐ SVC/Aorta/Oesophagus/Heart/Trachea
- ☐ diaphragm
- ☐ rib(s)
- ☐ vertebral body/ies ☐ One ☐ More than one
- ☐ neural foramina/spinal canal
- ☐ into pleural apex, involving vessel(s)/nerves
- ☐ main bronchus within 2cm of carina

Distal lung/lobar atelectasis : ☐ present lung/lobe ☐ absent lung/lobe

Other features: \_\_\_\_\_

Change from previous imaging: \_\_\_\_\_

Potential for percutaneous lung biopsy: ☐ yes ☐ no

Distance from pleura \_\_\_\_ cm

Cross fissure/bulla ☐ yes ☐ no

### **REGIONAL LYMPH NODES**

Nodes > 10mm short axis diameter

Ipsilateral bronchial or hilar LN: ☐ None ☐ present \_\_\_\_\_ mm

Ipsilateral mediastinal or  
Subcarinal LN: ☐ None ☐ present \_\_\_\_\_ mm

Contralateral mediastinal or  
Hilar, supraclavicular or  
scalene LN: ☐ None ☐ present \_\_\_\_\_ mm

Other distant LN: ☐ None ☐ present \_\_\_\_\_ mm

Site \_\_\_\_\_

### **METASTATIC DISEASE**

Metastatic disease in liver: ☐ no evidence ☐ indeterminate ☐ definite evidence

Incidental note: ☐ cysts ☐ haemangioma

- ☐ equivocal low density lesion
- ☐ for characterisation by MRI
- ☐ for characterisation by US
- ☐ requires follow up
- ☐ unlikely to represent metastatic disease

Pulmonary nodule(s):

- ☐ No CT evidence
- ☐ CT evidence      ☐ Ipsilateral      ☐ Contralateral
- ☐ Indeterminate solitary nodule requires follow up Size \_\_\_\_\_ mm
- ☐ Indeterminate multiple nodules require follow up. Number \_\_\_\_\_
- Lymphangitis carcinomatosa: ☐ Possible    ☐ Definite
- ☐ Unilobar    ☐ Multilobar

Other Details \_\_\_\_\_

Adrenal metastatic disease:

- ☐ no evidence
- ☐ definite metastases
- ☐ definite adenomas
- ☐ equivocal lesion requires other investigation

Bone metastatic disease:

- ☐ no evidence
- ☐ CT evidence
- ☐ equivocal – requires further investigation

Cerebral metastatic disease:

- ☐ no evidence
- ☐ CT evidence
- ☐ not assessed

|                            |                                      |                                        |                                    |
|----------------------------|--------------------------------------|----------------------------------------|------------------------------------|
| Pleural disease            | <input type="checkbox"/> Present     | <input type="checkbox"/> Absent        |                                    |
|                            | <input type="checkbox"/> Ipsilateral | <input type="checkbox"/> Contralateral | <input type="checkbox"/> Bilateral |
|                            | <input type="checkbox"/> Effusion    | <input type="checkbox"/> Thickening    | <input type="checkbox"/> Nodule(s) |
| Pericardial effusion       | <input type="checkbox"/> present     | <input type="checkbox"/> absent        |                                    |
| Other sites of metastases: | <input type="checkbox"/> no evidence |                                        |                                    |
|                            | <input type="checkbox"/> CT evidence |                                        |                                    |

---

**SUMMARY**

Overall stage      T \_\_\_\_\_ N \_\_\_\_\_ M \_\_\_\_\_

Discussion points for imaging case:



**Prostate proforma**

Hospital Name

Patient label

**REPORTING PROFORMA FOR STAGING PROSTATE**

**CANCER** (SECTIONS SHOWN IN BLUE ARE OPTIONAL)

|                                 |            |                                                                                                                               |           |                   |                        |
|---------------------------------|------------|-------------------------------------------------------------------------------------------------------------------------------|-----------|-------------------|------------------------|
| <b>Surname</b>                  |            | <b>Forenames</b>                                                                                                              |           | <b>Birth date</b> |                        |
| <b>Hospital</b>                 |            | <b>Hospital no</b>                                                                                                            |           | <b>NHS no</b>     |                        |
| <b>Examination date</b>         |            | <b>MDT date</b>                                                                                                               |           | <b>Consultant</b> |                        |
| <b>Clinical stage</b>           |            | <b>PSA/date</b>                                                                                                               |           | <b>TRUS date</b>  | <b>Lt</b> <b>Rt</b>    |
| <b>Treatments received</b>      |            |                                                                                                                               |           |                   |                        |
| <b>Examinations dates</b>       | <b>MRI</b> | <b>US</b>                                                                                                                     | <b>CT</b> | <b>Bone scan</b>  | <b>Other (specify)</b> |
| Prostate gland dimensions (XYZ) |            |                                                                                                                               |           | Volume (ml)       |                        |
| BPH                             |            | None <input type="checkbox"/> Mild <input type="checkbox"/> Moderate <input type="checkbox"/> Marked <input type="checkbox"/> |           |                   |                        |

Lesion locations & ECE (upto 3 lesions; including index cancer; lesion size; probability of clinically significant cancer 1-5 (Clinically significant disease - highly unlikely (1) ↔ clinically significant disease - unlikely (2) ↔ indeterminate ↔ clinically significant cancer likely (4) ↔ clinically significant disease - highly likely (5))

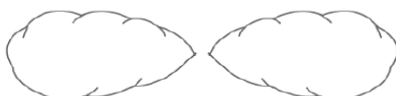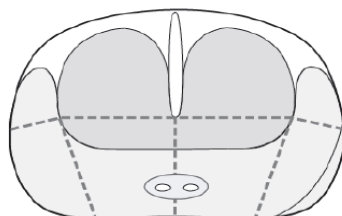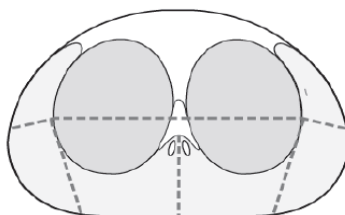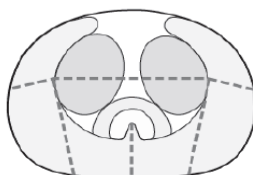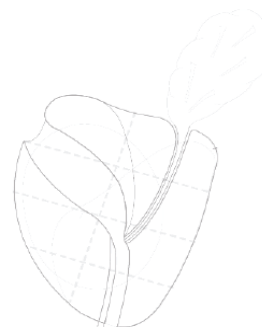



|                                               |     |                          |               |                          |    |                          |           |                          |
|-----------------------------------------------|-----|--------------------------|---------------|--------------------------|----|--------------------------|-----------|--------------------------|
| Organ confined                                | Yes | <input type="checkbox"/> | Indeterminate | <input type="checkbox"/> | No | <input type="checkbox"/> |           |                          |
| Beyond prostate (state side)                  | Yes | <input type="checkbox"/> | Indeterminate | <input type="checkbox"/> | No | <input type="checkbox"/> | Bilateral | <input type="checkbox"/> |
| Into seminal vesicle(s) (state side)          | Yes | <input type="checkbox"/> | Indeterminate | <input type="checkbox"/> | No | <input type="checkbox"/> | Bilateral | <input type="checkbox"/> |
| Into bladder neck                             | Yes | <input type="checkbox"/> | Indeterminate | <input type="checkbox"/> | No | <input type="checkbox"/> |           |                          |
| Fixed or into adjacent organs or pelvic wall. | Yes | <input type="checkbox"/> | Indeterminate | <input type="checkbox"/> | No | <input type="checkbox"/> | Specify:  |                          |
| Neurovascular bundle invasion                 | Yes | <input type="checkbox"/> | Indeterminate | <input type="checkbox"/> | No | <input type="checkbox"/> | Bilateral | <input type="checkbox"/> |

|                                                       |                      |                          |                                                                                     |                                 |                                 |
|-------------------------------------------------------|----------------------|--------------------------|-------------------------------------------------------------------------------------|---------------------------------|---------------------------------|
| <b>Nodal status</b><br>(draw sites of positive nodes) | <b>Node positive</b> | <input type="checkbox"/> | 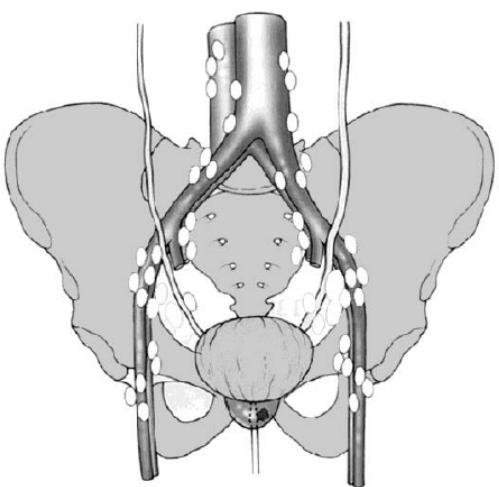 | Number (positive nodes/total)   |                                 |
|                                                       | <b>Node negative</b> | <input type="checkbox"/> |                                                                                     | Right side                      | Left side                       |
|                                                       | <b>Indeterminate</b> | <input type="checkbox"/> |                                                                                     | Maximum short axis dimension mm | Maximum short axis dimension mm |

|                   |                                 |                                           |                                |           |
|-------------------|---------------------------------|-------------------------------------------|--------------------------------|-----------|
| <b>Metastases</b> | Yes<br><input type="checkbox"/> | Indeterminate<br><input type="checkbox"/> | No<br><input type="checkbox"/> | Locations |
|-------------------|---------------------------------|-------------------------------------------|--------------------------------|-----------|

|                                                                                                                                                                                                                                                                                                                                                                                                                                                                                                                                                                                                                          |                                                                                                       |                                                                                                                                                                                                                                                                                                                                                                                                                                                             |
|--------------------------------------------------------------------------------------------------------------------------------------------------------------------------------------------------------------------------------------------------------------------------------------------------------------------------------------------------------------------------------------------------------------------------------------------------------------------------------------------------------------------------------------------------------------------------------------------------------------------------|-------------------------------------------------------------------------------------------------------|-------------------------------------------------------------------------------------------------------------------------------------------------------------------------------------------------------------------------------------------------------------------------------------------------------------------------------------------------------------------------------------------------------------------------------------------------------------|
| <b>TNM stage</b><br><input type="checkbox"/> Tx (cannot be assessed; should not be used for uncertainty in other T categories)<br><input type="checkbox"/> T1 (invisible by imaging)<br><input type="checkbox"/> T2a (tumour involves one half of one lobe or less)<br><input type="checkbox"/> T2a (tumour involves more than one half of one lobe but not both lobes)<br><input type="checkbox"/> T2c (bilateral disease)<br><input type="checkbox"/> T3a (EPE; unilateral or bilateral)<br><input type="checkbox"/> T3b (SV positive; unilateral or bilateral)<br><input type="checkbox"/> T4 (other organs involved) | <b>N</b><br><input type="checkbox"/> Nx<br><input type="checkbox"/> N0<br><input type="checkbox"/> N1 | <b>M</b><br><input type="checkbox"/> Mx (cannot be assessed)<br><input type="checkbox"/> M0 (No distant metastasis)<br><input type="checkbox"/> M1 (Distant metastasis)<br><input type="checkbox"/> M1a (Non regional node(s))<br><input type="checkbox"/> M1b (Bones)<br><input type="checkbox"/> M1c (Other site(s) with or without bone disease)<br><br>When more than one site of metastasis, the most advanced category is used. M1c is most advanced. |
|--------------------------------------------------------------------------------------------------------------------------------------------------------------------------------------------------------------------------------------------------------------------------------------------------------------------------------------------------------------------------------------------------------------------------------------------------------------------------------------------------------------------------------------------------------------------------------------------------------------------------|-------------------------------------------------------------------------------------------------------|-------------------------------------------------------------------------------------------------------------------------------------------------------------------------------------------------------------------------------------------------------------------------------------------------------------------------------------------------------------------------------------------------------------------------------------------------------------|

|                                                                                                                                                                   |
|-------------------------------------------------------------------------------------------------------------------------------------------------------------------|
| Additional comments                                                                                                                                               |
| Recommendations of further imaging<br>CT <input type="checkbox"/> MRI <input type="checkbox"/> PET-CT <input type="checkbox"/> Bone scan <input type="checkbox"/> |

**Signature** ..... **Date**.....

**Radiologist Name:**

**Cervical proforma**

## REPORTING PROFORMA FOR MRI STAGING IN PRIMARY CERVICAL CANCER

*(SECTIONS SHOWN IN BLUE ARE OPTIONAL)*

Surname..... Forenames..... Date of birth.....  
Hospital..... Hospital no.....

### Pre MRI clinical information (if available)

Previous biopsy      No biopsy ☐  
                                 Yes ☐      Date: ..... Cone ☐ LLETZ ☐  
Type:      squamous carcinoma ☐      adenosquamous carcinoma ☐      adenocarcinoma ☐  
                                 neuroendocrine carcinoma ☐      other ☐ specify.....  
  
Differentiation:      well/grade 1 ☐      moderate/grade 2 ☐      poor/grade 3 ☐  
                                 not applicable ☐

### Description of uterus

Dimensions of uterus: length.....mm      transverse.....mm      anteroposterior.....mm

### Cervix:

No tumour seen ☐  
Maximum dimensions of tumour:.....mm x .....mm x.....mm  
Tumour volume: ( $V=d1 \times d2 \times d3 \times \pi/6$ ). .....  
Position of cervical tumour: anterior ☐      posterior ☐      right ☐      left ☐      circumferential ☐  
Morphology:      ectocervix/exophytic ☐      endocervix ☐      barrel-shaped ☐

### Depth of transverse invasion:

Confined to cervix ☐      Deep stromal invasion ☐  
Parametrial invasion Rt ☐      Parametrial invasion Lt ☐  
Anterior paracervical invasion ☐      Posterior paracervical invasion ☐

### Vagina

Vaginal involvement Yes ☐ No ☐  
Anterior fornix involved ☐      Posterior fornix involved ☐  
Lower third of vagina involved ☐

### Pelvic side-wall

Involved      No ☐      Yes ☐  
Side of involvement:      Right ☐      Left ☐

Depth of involvement: Visceral ☐ Muscle ☐ Bone ☐

Hydronephrosis No ☐ Right ☐ Left ☐

Bladder

No involvement ☐

Serosal invasion ☐ Muscle invasion ☐ Mucosal invasion ☐

Rectum

No involvement ☐

Serosal invasion ☐ Muscle invasion ☐ Mucosal invasion ☐

Ascites

No ☐ small volume ☐ moderate volume ☐ large volume ☐

## Nodes

**Pelvis:**

Suspicious node >10mm SA yes ☐ no ☐

Suspicious node <10 mm SA yes ☐ no ☐

Necrosis ☐ Extra-nodal spread ☐

**Para-aortic**

Suspicious node > 10mm SA yes ☐ no ☐

Suspicious node <10 mm SA yes ☐ no ☐

Necrosis ☐ Extra-nodal spread ☐

Position of suspicious nodes:

Along external iliac vessels Rt short axis .....mm Lt short axis .....mm

Obturator fossa Rt short axis .....mm Lt short axis .....mm

Common iliac Rt short axis .....mm Lt short axis .....mm

Left para-aortic Short axis .....mm

Aorto-caval Short axis .....mm

Other .....

## Other tissues and organs:

Normal

Abnormal (describe)

Endometrium

☐

.....

Myometrium

☐

.....

Right adnexum

☐

.....

Left adnexum

☐

.....

Kidneys

☐

.....

Liver

☐

.....

Lungs

☐

Provisional radiological FIGO stage\* .....

iTNM stage: iT.....iN.....iM.....

---

Further recommendation/comments

: .....

Need for: CT chest/abdomen      ☐ No                      ☐ Yes                      Already available ☐

PET/CT                      ☐ No                      ☐ Yes                      Already available ☐

**Signature of Radiologist:** .....                      **Date**.....

---

**Endometrial proforma**

## REPORTING PROFORMA: MRI STAGING IN PRIMARY ENDOMETRIAL CANCER

*(SECTIONS SHOWN IN BLUE ARE OPTIONAL)*

Surname..... Forenames..... Date of birth.....  
Hospital..... Hospital no.....

Pre MRI clinical information (if available)

Previous biopsy    No biopsy ☐    Yes ☐    Date: .....

Type:                      endometrioid adenocarcinoma ☐  
                                adenosquamous carcinoma ☐  
                                Serous papillary carcinoma ☐    Clear cell carcinoma ☐  
                                Mixed Mullerian Tumour ☐    other ☐ specify.....

Differentiation:    well/grade 1 ☐                      moderate/grade 2 ☐                      poor/grade 3 ☐  
                                not available/applicable ☐

### Description of uterus

Dimensions of uterus: length.....mm    transverse.....mm    anteroposterior.....mm

Endometrial thickness: .....mm

Maximum dimensions of tumour: .....mm x .....mm x .....mm

Maximum depth of myometrial invasion                      Less than 50% ☐    Greater than 50% ☐

Position of tumour (predominant)    fundal ☐    mid uterine body ☐    lower uterine body ☐

Position of maximum myometrial invasion .....

Benign myometrial pathology:                      No ☐                      Adenomyosis ☐                      Bulky fibroids ☐

Uterine serosal involvement                      No ☐    Yes ☐

Cervix:                      No invasion ☐                      Stromal invasion ☐                      Parametrial invasion ☐

Ovarian involvement                      No ☐    Right ovarian involvement ☐    Left ovarian involvement ☐

Peritoneal involvement    No ☐    Pelvic peritoneal deposits ☐    Abdominal peritoneal deposits ☐

Vagina                      Vaginal involvement    No ☐    Upper third ☐    Middle third ☐    Lower third ☐

Bladder No involvement ☐  
 Serosal invasion ☐ Muscle invasion ☐ Mucosal invasion ☐

Rectum No involvement ☐  
 Serosal invasion ☐ Muscle invasion ☐ Mucosal invasion ☐

Hydronephrosis No ☐ Right ☐ Left ☐

Ascites No ☐ small volume ☐ moderate volume ☐ large volume ☐

## Nodes

**Pelvis:** Suspicious node >10mm SA yes ☐ no ☐  
 Suspicious node <10 mm SA yes ☐ no ☐  
 Necrosis ☐ Extra-nodal spread ☐

**Para-aortic** Suspicious node > 10mm SA yes ☐ no ☐  
 Suspicious node <10 mm SA yes ☐ no ☐  
 Necrosis ☐ Extra-nodal spread ☐

Position of suspicious nodes:

Along external iliac vessels Rt short axis .....mm Lt short axis .....mm  
 Obturator fossa Rt short axis .....mm Lt short axis .....mm  
 Common iliac Rt short axis .....mm Lt short axis .....mm  
 Left para-aortic Short axis .....mm  
 Aorto-caval Short axis .....mm  
 Other .....

## Other tissues and organs:

|            | Normal                   | Abnormal (describe) |
|------------|--------------------------|---------------------|
| Liver      | <input type="checkbox"/> | .....               |
| Kidneys    | <input type="checkbox"/> | .....               |
| Lungs      | <input type="checkbox"/> | .....               |
| Other..... | <input type="checkbox"/> | .....               |

Radiological FIGO stage.....

iTNM stage: iT.....iN.....iM.....



Further recommendation/ Comments

: .....

Need for CT chest/abdomen      ☐ No                      ☐ Yes      Already available ☐

**Signature of Radiologist:** .....      **Date**.....

---

## Rectal proforma

## REPORTING PRO FORMA FOR RECTAL CANCER

(SECTIONS SHOWN IN BLUE ARE OPTIONAL)

Patient Name: \_\_\_\_\_ Patient No: \_\_\_\_\_ Date of Birth: \_\_\_\_\_

Primary tumour: ☐ Annular ☐ Semi-annular ☐ Ulcerating ☐ Polypoidal ☐ Mucinous ☐ Not seen

Height from anal verge: \_\_\_\_\_ mm

Distal edge lies: \_\_\_\_\_ mm ☐ Above puborectalis sling ☐ At puborectalis sling ☐ below puborectalis sling

Extends craniocaudally over: \_\_\_\_\_ mm

Lies: ☐ Above the peritoneal reflection ☐ Below the peritoneal reflection ☐ At the peritoneal reflection

Invading edge of tumour: From \_\_\_\_\_ O'clock To \_\_\_\_\_ O'clock

Muscularis propria: ☐ Confined to ☐ Extends through

Extramural spread: \_\_\_\_\_ mm

T stage: ☐ T1 ☐ T2 ☐ T3a ☐ T3b ☐ T3c ☐ T3d ☐ T4 visceral ☐ T4 peritoneal

For low rectal tumours at or below the puborectalis sling

☐ Submucosal layer/part thickness of muscularis propria : intersphincteric plane/mesorectal plane is safe intersphincteric APE or ultra low TME possible, CRM is safe

☐ Full thickness of muscularis propria : intersphincteric plane/mesorectal plane is **unsafe**, Extralevator APE.

☐ Into intersphincteric plane : intersphincteric plane/mesorectal plane is **unsafe**, for extralevator APE.

☐ Into External sphincter : intersphincteric plane/mesorectal plane is **unsafe**.

☐ Beyond External sphincter into ischiorectal tissue : intersphincteric plane / mesorectal plane is **unsafe**.

Free Text Additional comments:

Lymph nodes:

☐ None ☐ Only benign reactive ☐ Present number \_\_\_\_\_ mixed signal/irregular border

Extramural venous invasion: ☐ No evidence ☐ Evidence

☐ Small ☐ Medium ☐ Large

Closest circumferential resection margin: \_\_\_\_\_ O'clock

The closest CRM is from ☐ Direct spread of tumour ☐ Extramural venous invasion ☐ Tumour deposit

Minimum tumour distance to mesorectal fascia: \_\_\_\_\_ mm    ☐ CRM clear    ☐ CRM involved

Peritoneal deposits:                    ☐ No evidence                    ☐ Evidence

Pelvic side wall lymph nodes:    ☐ None                    ☐ Benign                    ☐ Malignant mixed signal/irreg border

Location: Obturator fossa ☐ R ☐ L . External Iliac Nodes ☐ R ☐ L. Inf Hypogastric ☐ R ☐ L

Summary:      MRI Overall stage:      T \_\_\_\_\_      N \_\_\_\_\_      M \_\_\_\_\_

☐ CRM clear      ☐ CRM involved    ☐ EMVI positive    ☐ EMVI negative

☐ No adverse features eligible for primary surgery    ☐ Poor prognosis safe margins for preoperative therapy

☐ Poor prognosis unsafe margins eligible for preoperative chemoradiotherapy

## Post Treatment Assessment MRI Rectal Cancer

☐ The treated tumour: shows no fibrosis, TRG5  
☐ Less than <25% fibrosis, predominant tumour signal, TRG4  
☐ 50% tumour/fibrosis, TRG 3  
☐ >75% fibrosis, minimal tumour signal intensity, TRG2  
☐ low signal fibrosis only no intermediate tumour signal TRG1

---

Height from anal verge: \_\_\_\_\_ mm  
 Treated tumour distal edge is: \_\_\_\_\_ mm ☐ Above puborectalis sling ☐ At puborectalis sling ☐ below PR sling  
 Extends craniocaudally over: \_\_\_\_\_ mm  
 Lies: ☐ Above the peritoneal reflection ☐ Below the peritoneal reflection ☐ At the peritoneal reflection  
 Invading edge of treated tumour: From \_\_\_\_\_ O'clock To \_\_\_\_\_ O'clock  
 Tumour signal is ☐ Confined to ☐ Extends through the muscularis propria.  
 Fibrotic signal is ☐ Confined to ☐ Extends through muscularis propria.  
 Extramural spread: \_\_\_\_\_ mm for tumour signal \_\_\_\_\_ for fibrotic stroma \_\_\_\_\_  
 yMR T stage: ☐ T1 ☐ T2 ☐ T3a ☐ T3b ☐ T3c ☐ T3d ☐ T4 visceral ☐ T4 peritoneal

For low rectal tumours at or below the puborectalis sling tumour signal/fibrosis extends into

- ☐ Submucosal layer/part thickness of muscularis propria : intersphincteric plane/mesorectal plane is safe intersphincteric APE or ultra low TME possible, CRM is safe
- ☐ Full thickness of muscularis propria : intersphincteric plane/mesorectal plane is **unsafe**, Extralevator APE.
- ☐ Into intersphincteric plane : intersphincteric plane/mesorectal plane is **unsafe**, for extralevator APE.
- ☐ Into External sphincter : intersphincteric plane/mesorectal plane is **unsafe**.
- ☐ Beyond External sphincter into ischiorectal tissue : intersphincteric plane / mesorectal plane is **unsafe**.

Free Text Additional comments:

Lymph nodes:

☐ None ☐ Only benign reactive ☐ Present number \_\_\_\_\_ mixed signal/irregular border

Extramural venous invasion: ☐ No evidence ☐ Evidence  
☐ Small ☐ Medium ☐ Large

Closest circumferential resection margin: \_\_\_\_\_ O'clock

Closest CRM is from ☐ Direct spread of tumour ☐ Extramural venous invasion ☐ Tumour deposit

Minimum tumour distance to mesorectal fascia: \_\_\_\_\_ mm ☐ CRM clear ☐ CRM involved

Peritoneal deposits: ☐ No evidence ☐ Evidence

Pelvic side wall lymph nodes: ☐ None ☐ Benign ☐ Malignant

Location: Obturator fossa ☐ R ☐ L . External Iliac Nodes ☐ R ☐ L. Inf Hypogastric ☐ R ☐ L

**Summary:** y MRI Overall stage ymrT \_\_\_\_\_ ymr N \_\_\_\_\_ M \_\_\_\_\_ , TRG \_\_\_\_\_

☐ CRM clear ☐ CRM fibrosis only ☐ CRM involved

☐ EMVI positive ☐ EMVI negative

☐ Good prognosis, CRM clear, TRG 1-3, EMVI -ve ☐ Poor prognosis

## Colon proforma

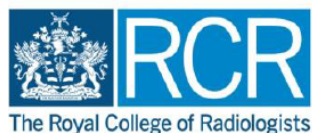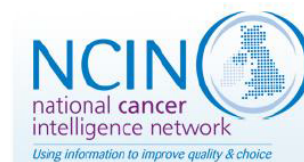

### REPORTING PRO FORMA FOR COLON CANCER

(SECTIONS SHOWN IN BLUE ARE OPTIONAL)

Patient Name: \_\_\_\_\_ Patient No: \_\_\_\_\_ Date of Birth: \_\_\_\_\_

Primary tumour: ☐ Annular ☐ Ulcerating ☐ Polypoidal ☐ Villous ☐ Eroding  
☐ Mucinous ☐ Not easily shown

Located in colon: ☐ Caecum ☐ Ascending ☐ Hepatic flexure ☐ Transverse ☐ Descending  
☐ Sigmoid ☐ Rectum ☐ Has been demonstrated on MRI scan, pls see report

Advancing edge tumour (border): ☐ Mesenteric ☐ Peritoneal ☐ N/A

To bowel wall: ☐ Confined ☐ Extends through  
Peritoneal infiltration: ☐ No evidence ☐ Evidence  
Tumour extension: ☐ <5mm ☐ >5mm Tumour  
Diameter: \_\_\_\_\_ mm Tumour Thickness: \_\_\_\_\_ mm

Lymph nodes in colonic mesentery: ☐ Benign ☐ Reactive ☐ Malignant

Extramural venous invasion: ☐ No evidence ☐ Evidence

Peritoneal disease: ☐ Absent ☐ Present

Retroperitoneal lymphadenopathy: ☐ Absent ☐ Present

Incidental note: ☐ Intra-abdominal pathology ☐ Pelvic pathology

Metastatic disease in liver: ☐ No evidence ☐ Evidence Details:  
☐ Segmental sparing ☐ No segmental sparing

Incidental note: ☐ Cysts ☐ Haemangioma ☐ Equivocal low density lesion  
☐ For characterisation by MRI ☐ Follow-up  
☐ Unlikely to represent metastatic disease

Pulmonary metastatic disease:    ☐ No CT evidence                      ☐ CT evidence

Details:

Summary:            Overall stage: T \_\_\_\_\_ N \_\_\_\_\_

☐ Resectable    ☐ Irresectable    ☐ EMVI positive    ☐ EMVI negative

☐ M0              ☐ M1                      ☐ Good prognosis              ☐ Poor prognosis

Discussion points for imaging case:

Radiologically Eligible for :
