# Supplementary material
Source: HighWire-hosted journal article supplement (https://bmjopen.bmj.com/content/8/10/e018499)
Supplement: inline-supplementary-material-2 [file inline-supplementary-material-2.pdf]

## Appendix 2

### Lung

| Proforma Staging Item                     | Clinical Strategy                                                                                                                                                  |
|-------------------------------------------|--------------------------------------------------------------------------------------------------------------------------------------------------------------------|
| <b>Tumour morphology</b>                  | Baseline for future response assessment                                                                                                                            |
| <b>Tumour location</b>                    | Biopsy target<br>Resectability/ surgical planning<br>Radiotherapy planning                                                                                         |
| <b>Tumour dimensions</b>                  | Surgical planning- parenchyma sparing vs lobectomy<br>Adjuvant chemotherapy selection (T2-3, and >4cm (NICE))<br>Baseline for future treatment response assessment |
| <b>Differentiation from consolidation</b> | Surgical planning- segmentectomy vs lobectomy<br>Radiotherapy planning                                                                                             |
| <b>Endobronchial disease</b>              | Guide biopsy<br>Radiotherapy/ surgical planning<br>Need for stenting                                                                                               |
| <b>Tumour locally invades</b>             | Operability<br>Surgical planning- en bloc resection<br>Radiotherapy planning<br>Anticipate complications<br>Specialist referral                                    |
| <b>Distal lung/ lobe atelectasis</b>      | Radiotherapy planning<br>Surgical planning                                                                                                                         |
| <b>Regional lymph nodes</b>               | Operability vs chemotherapy<br>Radiotherapy planning<br>Biopsy approach                                                                                            |
| <b>Metastatic disease liver</b>           | Operability<br>Chemotherapy                                                                                                                                        |
| <b>Pulmonary nodules</b>                  | Operability (if in same lobe)<br>Chemotherapy (different lobe to primary)                                                                                          |
| <b>Adrenal metastatic disease</b>         | Surgical planning (if solitary metastasis)<br>Chemotherapy (if multifocal metastasis)                                                                              |
| <b>Bone metastatic disease</b>            | Need for MRI<br>Chemotherapy<br>Radiotherapy                                                                                                                       |
| <b>Cerebral metastatic disease</b>        | Surgical resection<br>Radiotherapy planning<br>Need for urgent intervention e.g. decompression in hydrocephalus, steroids for oedema                               |
| <b>Pleural disease</b>                    | Operability<br>Surgical planning<br>Need for drainage                                                                                                              |
| <b>Pericardial effusion</b>               | Operability                                                                                                                                                        |
| <b>Other sites of disease</b>             | Operability<br>Systemic disease- chemotherapy                                                                                                                      |
| <b>Overall stage</b>                      | Prognosis and risk stratification                                                                                                                                  |

## Appendix 2

### Prostate

| Staging item                               | Clinical Strategy                                                               |
|--------------------------------------------|---------------------------------------------------------------------------------|
| Gland dimensions/ volume                   | Calculate PSA/ml enabling risk stratification- active surveillance vs treatment |
| Lesion location                            | EBRT/ brachytherapy planning                                                    |
| Organ confined                             | Radical surgical resection                                                      |
| Extending beyond the prostate              | Surgical planning or radiotherapy                                               |
| Extending into seminal vesicles            | Surgical planning                                                               |
| Extending into bladder neck                | Operability                                                                     |
| Fixed or into adjacent pelvic organs/ wall | Inoperable<br>Radiotherapy planning                                             |
| Neurovascular bundle                       | Nerve-sparing surgery possible                                                  |
| Pelvic nodes                               | Surgical and radiotherapy planning                                              |
| Nodes benign or malignant                  | Surgical and radiotherapy planning                                              |
| Anatomic location if positive              | Need for and extent of lymphadenectomy                                          |
| TNM staging                                |                                                                                 |

## Appendix 2

### Endometrial cancer

| Staging Item                        | Clinical strategy                                                                                                                                               |
|-------------------------------------|-----------------------------------------------------------------------------------------------------------------------------------------------------------------|
| <b>Size of uterus</b>               |                                                                                                                                                                 |
| <b>Endometrial thickness</b>        | Diagnosis                                                                                                                                                       |
| <b>Tumour dimensions</b>            |                                                                                                                                                                 |
| <b>Depth of myometrial invasion</b> | Surgical approach- radical, cytoreductive or palliative<br>Correlates with risk of lymph node involvement- need for lymphadenectomy<br>5 year prognostic factor |
| <b>Benign myometrial pathology</b>  |                                                                                                                                                                 |
| <b>Uterine serosal involvement</b>  | Stage III disease<br>Surgical approach- radical, cytoreductive or palliative                                                                                    |
| <b>Cervix involvement</b>           | Surgical approach- radical, cytoreductive or palliative<br>Predictor of lymph node involvement and extra-uterine disease                                        |
| <b>Ovarian involvement</b>          | Surgical approach- radical, cytoreductive or palliative                                                                                                         |
| <b>Peritoneal involvement</b>       | Systemic therapeutic approach                                                                                                                                   |
| <b>Rectum involvement</b>           | Need for posterior exenteration                                                                                                                                 |
| <b>Hydronephrosis</b>               | Need for urgent urinary tract decompression<br>Surgical planning - anterior exenteration                                                                        |
| <b>Ascites</b>                      | Risk peritoneal disease                                                                                                                                         |
| <b>Pelvic nodes</b>                 | lymphadenectomy                                                                                                                                                 |
| <b>Para-aortic nodes</b>            | Para-aortic lymphadenectomy                                                                                                                                     |
| <b>FIGO stage</b>                   | Prognostic stratification                                                                                                                                       |
| <b>TNM stage</b>                    | Prognostic stratification                                                                                                                                       |

## Appendix 2

### Cervical cancer

| Staging item               | Clinical strategy                                                                                                                 |
|----------------------------|-----------------------------------------------------------------------------------------------------------------------------------|
| <b>Tumour size</b>         | Chemoradiotherapy for bulky tumours<br>Radiotherapy planning<br>Uterus preserving surgery<br>Predictive of lymph node involvement |
| <b>Tumour position</b>     | Surgical planning<br>Trachelectomy planning                                                                                       |
| <b>Morphology</b>          |                                                                                                                                   |
| <b>Depth of invasion</b>   | Radical surgery possible or not- parametrial invasion                                                                             |
| <b>Vaginal involvement</b> | Surgical planning<br>CRT planning                                                                                                 |
| <b>PSW involvement</b>     | Need for lymphadenectomy in early tumours                                                                                         |
| <b>Hydronephrosis</b>      | Intervention to decompress                                                                                                        |
| <b>Bladder involvement</b> | CRT planning                                                                                                                      |
| <b>Rectum involvement</b>  | CRT planning                                                                                                                      |
| <b>Ascites</b>             | Distant metastases                                                                                                                |
| <b>Pelvic nodes</b>        | Precludes radical surgery- CRT or debulking and CRT<br>Radiotherapy field                                                         |
| <b>Paraaortic nodes</b>    | Metastatic disease                                                                                                                |
| <b>Endometrium</b>         | Feasibility of fertility preserving surgery- trachelectomy<br>Predicting risk of nodal metastases                                 |
| <b>Myometrium</b>          | Fertility preserving surgery- trachelectomy<br>Predicting risk of nodal metastases                                                |
| <b>Adenexae</b>            | Surgical planning                                                                                                                 |
| <b>TNM</b>                 | Prognostic stratification                                                                                                         |
| <b>FIGO</b>                | Prognostic stratification                                                                                                         |

## Appendix 2

### Rectal Cancer

| Staging item                                    | Clinical Strategy                                                                                  |
|-------------------------------------------------|----------------------------------------------------------------------------------------------------|
| <b>Tumour morphology</b>                        | Prognosis and baseline for tumour response                                                         |
| <b>Height from anal verge</b>                   | Surgical and radiotherapy planning                                                                 |
| <b>Distal edge to PS sling</b>                  | Surgical planning- organ/ sphincter preservation                                                   |
| <b>Muscularis propria breach</b>                | Neoadjuvant treatment decision<br>T1- local excision                                               |
| <b>Depth of extramural spread</b>               | Selective use of chemotherapy/ radiotherapy/ CRT                                                   |
| <b>T sub stage</b>                              | Prognostic                                                                                         |
| <b>Description of low rectal tumour</b>         | Surgical and radiotherapy planning<br>Treatment intent?                                            |
| <b>Extra-mural venous invasion</b>              | Neoadjuvant treatment decision                                                                     |
| <b>Site of closest CRM</b>                      | Surgical and radiotherapy planning                                                                 |
| <b>Tumour distance to mesorectal fascia</b>     | Surgical and radiotherapy planning                                                                 |
| <b>Peritoneal deposits</b>                      | Surgical and radiotherapy planning<br>Radicality of neoadjuvant treatment                          |
| <b>PSW lymph nodes stated and characterised</b> | Surgical and radiotherapy targeting<br>Neoadjuvant treatment selection                             |
| <b>MRI overall T sub stage and N stage</b>      | Prognosis and risk stratification                                                                  |
| <b>CRM clear or involved</b>                    | Surgical and radiotherapy planning<br>TME or beyond TME surgery<br>Neoadjuvant treatment selection |
| <b>EMVI positive/ negative</b>                  | Neoadjuvant and adjuvant treatment decisions<br>Prognostic indicator                               |

## Appendix 2

### Colon cancer

| Staging item                         | Clinical strategy                                                                                                           |
|--------------------------------------|-----------------------------------------------------------------------------------------------------------------------------|
| Location in colon                    | Surgical planning                                                                                                           |
| Advancing edge                       | Surgical planning                                                                                                           |
| Confined to bowel wall               | Neoadjuvant treatment vs primary surgery                                                                                    |
| Peritoneal infiltration              | Surgical planning, neoadjuvant and adjuvant treatment decisions                                                             |
| Tumour extramural extension distance | Surgical planning                                                                                                           |
| Tumour diameter/thickness            | Surgical planning                                                                                                           |
| Peritoneal disease                   | Neoadjuvant treatment                                                                                                       |
| Retroperitoneal lymphadenopathy      | Surgical planning<br>Neoadjuvant and adjuvant treatment decisions                                                           |
| Hepatic metastatic disease           | Surgical planning- operable?<br>Neoadjuvant adjuvant treatment decisions treatment                                          |
| Pulmonary metastatic disease         | Neoadjuvant treatment<br>Operability<br>Surgical adjuvant treatment decisions planning<br>Prognosis and risk stratification |
| Resectable/ irresectable             | Operable vs inoperable                                                                                                      |
| M0/M1                                | Neoadjuvant and adjuvant treatment decisions. Palliative treatment selection                                                |
