# Supplementary material
Source: HighWire-hosted journal article supplement (https://bmjopen.bmj.com/content/8/10/e018499)
Supplement: inline-supplementary-material-3 [file inline-supplementary-material-3.pdf]

Lung coding form

PROFORMA REPORT LUNG      SITE No.      .....      REPORT No.      .....

|    | Data field                               |  |
|----|------------------------------------------|--|
| 1  | Tumour morphology                        |  |
| 2  | Tumour location                          |  |
| 3  | Tumour dimensions                        |  |
| 4  | Differentiation from local consolidation |  |
| 5  | Endobronchial disease                    |  |
| 6  | Tumour locally invades                   |  |
| 7  | Distal lung/lobe atelectasis             |  |
| 8  | Regional lymph nodes                     |  |
| 9  | Metastatic disease - liver               |  |
| 10 | Pulmonary nodules                        |  |
| 11 | Adrenal metastatic disease               |  |
| 12 | Bone metastatic disease                  |  |
| 13 | Cerebral metastatic disease              |  |
| 14 | Pleural disease                          |  |
| 15 | Pericardial effusion                     |  |
| 16 | Other sites of metastases                |  |
| 17 | Overall stage                            |  |

## Prostate coding form

PROFORMA REPORT PROSTATE SITE No ..... REPORT No. ....

|    | Data field                                   |  |
|----|----------------------------------------------|--|
| 1  | Prostate gland dimensions/volume             |  |
| 2  | BPH                                          |  |
| 3  | Lesion location                              |  |
| 4  | Organ confined                               |  |
| 5  | Extending beyond prostate                    |  |
| 6  | Extending into seminal vesicles              |  |
| 7  | Extending into bladder neck                  |  |
| 8  | Fixed or into adjacent organs or pelvic wall |  |
| 9  | Neurovascular bundle                         |  |
| 10 | Pelvic nodes                                 |  |
| 11 | Stated whether nodes benign or malignant     |  |
| 12 | Anatomic location (stated if positive)       |  |
| 13 | TNM staging                                  |  |

## Cervical coding form

PROFORMA REPORT CERVICAL SITE No. ....

REPORT No. ....

|    | Data field                   |  |
|----|------------------------------|--|
| 1  | Tumour size                  |  |
| 2  | Tumour position              |  |
| 3  | Morphology                   |  |
| 4  | Depth of invasion            |  |
| 5  | Vaginal involvement          |  |
| 6  | Pelvic side wall involvement |  |
| 7  | Hydronephrosis               |  |
| 8  | Bladder involvement          |  |
| 9  | Rectum involvement           |  |
| 10 | Ascites                      |  |
| 11 | Pelvic nodes                 |  |
| 12 | Para-aortic nodes            |  |
| 13 | Endometrium                  |  |
| 14 | Myometrium                   |  |
| 15 | Right & left adnexae         |  |
| 16 | FIGO stage                   |  |
| 17 | iTNM stage                   |  |

## Endometrial coding form

PROFORMA REPORT ENDOMETRIAL    SITE No.                      .....                      REPORT No.                      .....

|    | Data field                   |  |
|----|------------------------------|--|
| 1  | Size of uterus               |  |
| 2  | Endometrial thickness        |  |
| 3  | Tumour dimensions            |  |
| 4  | Depth of myometrial invasion |  |
| 5  | Benign myometrial pathology  |  |
| 6  | Uterine serosal involvement  |  |
| 7  | Cervix                       |  |
| 8  | Ovarian involvement          |  |
| 9  | Peritoneal involvement       |  |
| 10 | Vaginal involvement          |  |
| 11 | Bladder involvement          |  |
| 12 | Rectum involvement           |  |
| 13 | Hydronephrosis               |  |
| 14 | Ascites                      |  |
| 15 | Pelvic nodes                 |  |
| 16 | Para-aortic nodes            |  |
| 17 | FIGO stage                   |  |
| 18 | iTNM stage                   |  |

## Colon coding form

PROFORMA REPORT COLON      SITE No.      .....      REPORT No.      .....

|    | Data field                         |  |
|----|------------------------------------|--|
| 1  | Location in colon                  |  |
| 2  | Advancing edge tumour              |  |
| 3  | Bowel wall confined or not         |  |
| 4  | Peritoneal infiltration            |  |
| 5  | Tumour extension                   |  |
| 6  | Tumour diameter/thickness          |  |
| 7  | Peritoneal disease                 |  |
| 8  | Retroperitoneal lymphadenopathy    |  |
| 9  | Metastatic disease in liver        |  |
| 10 | Pulmonary metastatic disease       |  |
| 11 | Overall stage T sub stage& N stage |  |
| 12 | Resectable/irresectable            |  |
| 13 | M0/M1                              |  |

## Rectal coding form

PROFORMA REPORT RECTAL SITE No. .... REPORT No. ....

|    | Data field                                            |  |
|----|-------------------------------------------------------|--|
| 1  | Tumour morphology                                     |  |
| 2  | Height from anal verge                                |  |
| 3  | Distal edge to PR sling                               |  |
| 4  | Muscularis propria breached                           |  |
| 5  | Extramural spread depth given                         |  |
| 6  | T sub-stage                                           |  |
| 7  | Description low rectal tumours                        |  |
| 8  | Extramural venous invasion                            |  |
| 9  | Site of closest CRM                                   |  |
| 10 | Tumour distance to mesorectal fascia                  |  |
| 11 | Peritoneal deposits                                   |  |
| 12 | Pelvic side wall lymph nodes stated & characteristics |  |
| 13 | MRI overall stage T sub stage, N stage                |  |
| 14 | CRM clear/involved                                    |  |
| 15 | EMVI positive/negative                                |  |
