# Supplementary material
Source: HighWire-hosted journal article supplement (https://bmjopen.bmj.com/content/8/10/e018499)
Supplement: inline-supplementary-material-5 [file inline-supplementary-material-5.pdf]

Appendix 5 Table 1

Percentage completeness for each predetermined data item - LUNG

|                                          | PRE  |     |     |       |              |            | POST |     |     |       |              |            | Proportion difference |            |
|------------------------------------------|------|-----|-----|-------|--------------|------------|------|-----|-----|-------|--------------|------------|-----------------------|------------|
|                                          | yes  | no  | n/a | total | total needed | % complete | yes  | no  | n/a | total | total needed | % complete |                       | 95% CI     |
| Tumour morphology                        | 82   | 41  | 2   | 125   | 123          | 67%        | 76   | 8   | 0   | 84    | 84           | 90%        | 0.24                  | 0.13-0.34  |
| Tumour location                          | 99   | 24  | 2   | 125   | 123          | 80%        | 82   | 2   | 0   | 84    | 84           | 98%        | 0.17                  | 0.9-0.25   |
| Tumour dimensions                        | 114  | 9   | 2   | 125   | 123          | 93%        | 80   | 0   | 4   | 84    | 80           | 100%       | 0.07                  | 0.02-0.13  |
| Differentiation from local consolidation | 68   | 27  | 30  | 125   | 95           | 72%        | 22   | 10  | 52  | 84    | 32           | 69%        | - 0.03                | -0.22-0.14 |
| Endobronchial disease                    | 69   | 50  | 6   | 125   | 119          | 58%        | 78   | 6   | 0   | 84    | 84           | 93%        | 0.35                  | 0.24-0.45  |
| Tumour locally invades                   | 97   | 24  | 4   | 125   | 121          | 80%        | 68   | 16  | 0   | 84    | 84           | 81%        | 0.01                  | -0.11-0.11 |
| Distal lung/lobe atelectasis             | 70   | 51  | 4   | 125   | 121          | 58%        | 69   | 14  | 1   | 84    | 83           | 83%        | 0.25                  | 0.13-0.36  |
| Regional lymph nodes                     | 117  | 8   | 0   | 125   | 125          | 94%        | 84   | 0   | 0   | 84    | 84           | 100%       | 0.06                  | 0.01-0.12  |
| Metastatic disease - liver               | 118  | 6   | 1   | 125   | 124          | 95%        | 83   | 1   | 0   | 84    | 84           | 99%        | 0.04                  | -0.02-0.09 |
| Pulmonary nodules                        | 114  | 11  | 0   | 125   | 125          | 91%        | 79   | 5   | 0   | 84    | 84           | 94%        | 0.03                  | -0.05-0.10 |
| Adrenal metastatic disease               | 114  | 10  | 1   | 125   | 124          | 92%        | 83   | 1   | 0   | 84    | 84           | 99%        | 0.07                  | 0.0-0.13   |
| Bone metastatic disease                  | 107  | 17  | 1   | 125   | 124          | 86%        | 81   | 3   | 0   | 84    | 84           | 96%        | 0.10                  | 0.02-0.18  |
| Cerebral metastatic disease              | 5    | 24  | 96  | 125   | 29           | 17%        | 60   | 12  | 12  | 84    | 72           | 83%        | 0.66                  | 0.46-0.78  |
| Pleural disease                          | 86   | 39  | 0   | 125   | 125          | 69%        | 82   | 2   | 0   | 84    | 84           | 98%        | 0.29                  | 0.19-0.38  |
| Pericardial effusion                     | 67   | 58  | 0   | 125   | 125          | 54%        | 61   | 23  | 0   | 84    | 84           | 73%        | 0.19                  | 0.06-0.31  |
| Other sites of metastases                | 101  | 17  | 7   | 125   | 118          | 86%        | 66   | 18  | 0   | 84    | 84           | 79%        | - 0.07                | -0.18-0.04 |
| Overall stage                            | 81   | 44  | 0   | 125   | 125          | 65%        | 82   | 2   | 0   | 84    | 84           | 98%        | 0.33                  | 0.23-0.42  |
| Overall total                            | 1509 | 460 | 156 | 2125  | 1969         | 77%        | 1236 | 123 | 69  | 1428  | 1359         | 91%        | 0.14                  | 0.12-0.17  |

Appendix 5 Table 2

Percentage completeness for each predetermined data item - PROSTATE

|                                              | PRE |      |     |       |              |            | POST |     |     |       |              |            | Proportion difference |            |
|----------------------------------------------|-----|------|-----|-------|--------------|------------|------|-----|-----|-------|--------------|------------|-----------------------|------------|
|                                              | yes | no   | n/a | total | total needed | % complete | yes  | no  | n/a | total | total needed | % complete | %                     | 95% CI     |
| Prostate gland dimensions/volume             | 29  | 127  | 0   | 156   | 156          | 19%        | 86   | 22  | 0   | 108   | 108          | 80%        | 0.61                  | 0.50-0.69  |
| BPH                                          | 32  | 124  | 0   | 156   | 156          | 21%        | 73   | 35  | 0   | 108   | 108          | 68%        | 0.47                  | 0.35-0.57  |
| Lesion location                              | 114 | 42   | 0   | 156   | 156          | 73%        | 87   | 2   | 19  | 108   | 89           | 98%        | 0.25                  | 0.16-0.32  |
| Organ confined                               | 106 | 50   | 0   | 156   | 156          | 68%        | 71   | 17  | 20  | 108   | 88           | 81%        | 0.13                  | 0.01-0.23  |
| Extending beyond prostate                    | 101 | 55   | 0   | 156   | 156          | 65%        | 61   | 27  | 20  | 108   | 88           | 69%        | 0.05                  | -0.08-0.16 |
| Extending into seminal vesicles              | 96  | 60   | 0   | 156   | 156          | 62%        | 85   | 4   | 19  | 108   | 89           | 96%        | 0.34                  | 0.24-0.42  |
| Extending into bladder neck                  | 16  | 140  | 0   | 156   | 156          | 10%        | 57   | 31  | 20  | 108   | 88           | 65%        | 0.55                  | 0.43-0.64  |
| Fixed or into adjacent organs or pelvic wall | 15  | 141  | 0   | 156   | 156          | 10%        | 57   | 31  | 20  | 108   | 88           | 65%        | 0.55                  | 0.43-0.65  |
| Neurovascular bundle                         | 25  | 131  | 0   | 156   | 156          | 16%        | 62   | 26  | 20  | 108   | 88           | 70%        | 0.54                  | 0.42-0.64  |
| Pelvic nodes                                 | 146 | 10   | 0   | 156   | 156          | 94%        | 105  | 3   | 0   | 108   | 108          | 97%        | 0.04                  | -0.02-0.09 |
| Nodes benign or malignant                    | 97  | 49   | 10  | 156   | 146          | 66%        | 13   | 5   | 90  | 108   | 18           | 72%        | 0.06                  | -0.18-0.23 |
| Anatomic location if positive                | 37  | 45   | 74  | 156   | 82           | 45%        | 14   | 4   | 90  | 108   | 18           | 78%        | 0.33                  | 0.07-0.49  |
| TNM staging                                  | 71  | 85   | 0   | 156   | 156          | 46%        | 100  | 8   | 0   | 108   | 108          | 93%        | 0.47                  | 0.37-0.56  |
| Overall total                                | 885 | 1059 | 84  | 2028  | 1944         | 46%        | 871  | 215 | 318 | 1404  | 1086         | 80%        | 0.35                  | 0.31-0.38  |

Appendix 5 Table 3

Percentage completeness for each predetermined data item - CERVICAL

|                              | PRE |     |     |       |              |            | POST |     |     |       |              |            | Proportion difference |            |
|------------------------------|-----|-----|-----|-------|--------------|------------|------|-----|-----|-------|--------------|------------|-----------------------|------------|
|                              | yes | no  | n/a | total | total needed | % complete | yes  | no  | n/a | total | total needed | % complete |                       | 95% CI     |
| Tumour size                  | 70  | 17  | 30  | 117   | 87           | 80%        | 29   | 2   | 15  | 46    | 31           | 94%        | 0.13                  | 0.03-0.24  |
| Tumour position              | 44  | 43  | 30  | 117   | 87           | 51%        | 29   | 2   | 15  | 46    | 31           | 94%        | 0.43                  | 0.25-0.54  |
| Morphology                   | 31  | 56  | 30  | 117   | 87           | 36%        | 26   | 5   | 15  | 46    | 31           | 84%        | 0.48                  | 0.29-0.61  |
| Depth of invasion            | 68  | 49  | 0   | 117   | 117          | 58%        | 27   | 4   | 15  | 46    | 31           | 87%        | 0.29                  | 0.11-0.41  |
| Vaginal involvement          | 53  | 64  | 0   | 117   | 117          | 45%        | 44   | 2   | 0   | 46    | 46           | 96%        | 0.50                  | 0.37-0.60  |
| Pelvic side wall involvement | 33  | 84  | 0   | 117   | 117          | 28%        | 45   | 1   | 0   | 46    | 46           | 98%        | 0.70                  | 0.60-0.77  |
| Hydronephrosis               | 66  | 51  | 0   | 117   | 117          | 56%        | 30   | 16  | 0   | 46    | 46           | 65%        | 0.09                  | -0.08-0.24 |
| Bladder involvement          | 43  | 74  | 0   | 117   | 117          | 37%        | 46   | 0   | 0   | 46    | 46           | 100%       | 0.63                  | 0.51-0.71  |
| Rectum involvement           | 38  | 79  | 0   | 117   | 117          | 32%        | 46   | 0   | 0   | 46    | 46           | 100%       | 0.68                  | 0.56-0.75  |
| Ascites                      | 34  | 83  | 0   | 117   | 117          | 29%        | 33   | 13  | 0   | 46    | 46           | 72%        | 0.43                  | 0.26-0.56  |
| Pelvic nodes                 | 111 | 6   | 0   | 117   | 117          | 95%        | 45   | 1   | 0   | 46    | 46           | 98%        | 0.03                  | -0.07-0.09 |
| Para-aortic nodes            | 93  | 24  | 0   | 117   | 117          | 79%        | 39   | 7   | 0   | 46    | 46           | 85%        | 0.05                  | -0.09-0.17 |
| Endometrium                  | 39  | 78  | 0   | 117   | 117          | 33%        | 30   | 16  | 0   | 46    | 46           | 65%        | 0.32                  | 0.13-0.46  |
| Myometrium                   | 45  | 72  | 0   | 117   | 117          | 38%        | 29   | 17  | 0   | 46    | 46           | 63%        | 0.25                  | 0.08-0.40  |
| Right & left adnexae         | 74  | 43  | 0   | 117   | 117          | 63%        | 33   | 13  | 0   | 46    | 46           | 72%        | 0.08                  | -0.08-0.23 |
| FIGO stage                   | 63  | 43  | 11  | 117   | 106          | 59%        | 34   | 10  | 2   | 46    | 44           | 77%        | 0.18                  | 0.01-0.32  |
| iTNM stage                   | 13  | 93  | 11  | 117   | 106          | 12%        | 31   | 15  | 0   | 46    | 46           | 67%        | 0.55                  | 0.39-0.68  |
| Overall total                | 918 | 959 | 112 | 1989  | 1877         | 49%        | 596  | 124 | 62  | 782   | 720          | 83%        | 0.34                  | 0.30-0.37  |

Appendix 5 Table 4

Percentage completeness for each predetermined data item - ENDOMETRIAL

|                              | PRE |      |     |       |              |            | POST |     |     |       |              |            | Proportion difference |            |
|------------------------------|-----|------|-----|-------|--------------|------------|------|-----|-----|-------|--------------|------------|-----------------------|------------|
|                              | yes | no   | n/a | total | total needed | % complete | yes  | no  | n/a | total | total needed | % complete |                       | 95% CI     |
| Size of uterus               | 48  | 64   | 0   | 112   | 112          | 43%        | 59   | 0   | 0   | 59    | 59           | 100%       | 0.57                  | 0.46-0.66  |
| Endometrial thickness        | 31  | 81   | 0   | 112   | 112          | 28%        | 56   | 2   | 1   | 59    | 58           | 97%        | 0.69                  | 0.57-0.77  |
| Tumour dimensions            | 55  | 53   | 4   | 112   | 108          | 51%        | 57   | 0   | 2   | 59    | 57           | 100%       | 0.49                  | 0.38-0.58  |
| Depth of myometrial invasion | 84  | 25   | 3   | 112   | 109          | 77%        | 59   | 0   | 0   | 59    | 59           | 100%       | 0.23                  | 0.14-0.32  |
| Benign myometrial pathology  | 28  | 84   | 0   | 112   | 112          | 25%        | 35   | 24  | 0   | 59    | 59           | 59%        | 0.34                  | 0.19-0.48  |
| Uterine serosal involvement  | 29  | 83   | 0   | 112   | 112          | 26%        | 57   | 2   | 0   | 59    | 59           | 97%        | 0.71                  | 0.59-0.78  |
| Cervix                       | 64  | 48   | 0   | 112   | 112          | 57%        | 59   | 0   | 0   | 59    | 59           | 100%       | 0.43                  | 0.32-0.52  |
| Ovarian involvement          | 75  | 37   | 0   | 112   | 112          | 67%        | 55   | 4   | 0   | 59    | 59           | 93%        | 0.26                  | 0.14-0.36  |
| Peritoneal involvement       | 23  | 89   | 0   | 112   | 112          | 21%        | 34   | 25  | 0   | 59    | 59           | 58%        | 0.37                  | 0.22-0.50  |
| Vaginal involvement          | 9   | 103  | 0   | 112   | 112          | 8%         | 59   | 0   | 0   | 59    | 59           | 100%       | 0.92                  | 0.83-0.96  |
| Bladder involvement          | 8   | 104  | 0   | 112   | 112          | 7%         | 59   | 0   | 0   | 59    | 59           | 100%       | 0.93                  | 0.84-0.96  |
| Rectum involvement           | 4   | 108  | 0   | 112   | 112          | 4%         | 59   | 0   | 0   | 59    | 59           | 100%       | 0.96                  | 0.88-0.99  |
| Hydronephrosis               | 29  | 83   | 0   | 112   | 112          | 26%        | 33   | 26  | 0   | 59    | 59           | 56%        | 0.30                  | 0.15-0.44  |
| Ascites                      | 48  | 64   | 0   | 112   | 112          | 43%        | 34   | 25  | 0   | 59    | 59           | 58%        | 0.15                  | -0.01-0.29 |
| Pelvic nodes                 | 107 | 5    | 0   | 112   | 112          | 96%        | 59   | 0   | 0   | 59    | 59           | 100%       | 0.04                  | -0.02-0.10 |
| Para-aortic nodes            | 85  | 25   | 2   | 112   | 110          | 77%        | 58   | 1   | 0   | 59    | 59           | 98%        | 0.21                  | 0.11-0.30  |
| FIGO stage                   | 82  | 29   | 1   | 112   | 111          | 74%        | 58   | 1   | 0   | 59    | 59           | 98%        | 0.24                  | 0.14-0.33  |
| iTNM stage                   | 14  | 97   | 1   | 112   | 111          | 13%        | 31   | 28  | 0   | 59    | 59           | 53%        | 0.40                  | 0.25-0.53  |
| Overall total                | 823 | 1182 | 11  | 2016  | 2005         | 41%        | 921  | 138 | 3   | 1062  | 1059         | 87%        | 0.46                  | 0.43-0.49  |

Appendix 5 Table 5

Percentage completeness for each predetermined data item - COLON

|                                 | PRE |      |     |       |              |            | POST |    |     |       |              |            | Proportion difference |            |
|---------------------------------|-----|------|-----|-------|--------------|------------|------|----|-----|-------|--------------|------------|-----------------------|------------|
|                                 | yes | no   | n/a | total | total needed | % complete | yes  | no | n/a | total | total needed | % complete |                       | 95% CI     |
| Location in colon               | 124 | 16   | 2   | 142   | 140          | 89%        | 85   | 1  | 2   | 88    | 86           | 99%        | 0.10                  | 0.04-0.17  |
| Advancing edge tumour           | 5   | 124  | 13  | 142   | 129          | 4%         | 83   | 2  | 3   | 88    | 85           | 98%        | 0.94                  | 0.86-0.97  |
| Bowel wall confined or not      | 59  | 71   | 12  | 142   | 130          | 45%        | 83   | 3  | 2   | 88    | 86           | 97%        | 0.51                  | 0.41-0.60  |
| Peritoneal infiltration         | 15  | 115  | 12  | 142   | 130          | 12%        | 80   | 7  | 1   | 88    | 87           | 92%        | 0.80                  | 0.70-0.86  |
| Tumour extension distance       | 33  | 96   | 13  | 142   | 129          | 26%        | 62   | 24 | 2   | 88    | 86           | 72%        | 0.47                  | 0.33-0.57  |
| Tumour diameter/thickness       | 19  | 112  | 11  | 142   | 131          | 15%        | 68   | 18 | 2   | 88    | 86           | 79%        | 0.65                  | 0.52-0.73  |
| Peritoneal disease              | 13  | 129  | 0   | 142   | 142          | 9%         | 83   | 5  | 0   | 88    | 88           | 94%        | 0.85                  | 0.76-0.90  |
| Retroperitoneal lymphadenopathy | 87  | 55   | 0   | 142   | 142          | 61%        | 85   | 3  | 0   | 88    | 88           | 97%        | 0.35                  | 0.26-0.44  |
| Metastatic disease in liver     | 134 | 8    | 0   | 142   | 142          | 94%        | 87   | 1  | 0   | 88    | 88           | 99%        | 0.04                  | -0.01-0.10 |
| Pulmonary metastatic disease    | 123 | 13   | 6   | 142   | 136          | 90%        | 84   | 4  | 0   | 88    | 88           | 95%        | 0.05                  | -0.03-0.12 |
| T substage & N stage            | 37  | 103  | 2   | 142   | 140          | 26%        | 88   | 0  | 0   | 88    | 88           | 100%       | 0.74                  | 0.65-0.80  |
| Resectable irresectable         | 0   | 142  | 0   | 142   | 142          | 0%         | 73   | 15 | 0   | 88    | 88           | 83%        | 0.83                  | 0.73-0.89  |
| M0/M1                           | 58  | 84   | 0   | 142   | 142          | 41%        | 88   | 0  | 0   | 88    | 88           | 100%       | 0.59                  | 0.50-0.67  |
| Overall total                   | 707 | 1068 | 71  | 1846  | 1775         | 40%        | 1049 | 83 | 12  | 1144  | 1132         | 93%        | 0.53                  | 0.50-0.55  |

Appendix 5 Table 6

Percentage completeness for each predetermined data item - RECTAL

|                                                       | PRE |      |     |       |              |            | POST |     |     |       |              |            | Proportion difference |            |
|-------------------------------------------------------|-----|------|-----|-------|--------------|------------|------|-----|-----|-------|--------------|------------|-----------------------|------------|
|                                                       | yes | no   | n/a | total | total needed | % complete | yes  | no  | n/a | total | total needed | % complete |                       | 95% CI     |
| Tumour morphology stated                              | 51  | 83   | 1   | 135   | 134          | 38%        | 108  | 1   | 2   | 111   | 109          | 99%        | 0.61                  | 0.52-0.69  |
| Height from anal verge                                | 79  | 56   | 0   | 135   | 135          | 59%        | 109  | 0   | 2   | 111   | 109          | 100%       | 0.41                  | 0.33-0.50  |
| Distal edge to PR sling                               | 31  | 104  | 0   | 135   | 135          | 23%        | 102  | 7   | 2   | 111   | 109          | 94%        | 0.71                  | 0.61-0.78  |
| Muscularis propria breached                           | 123 | 12   | 0   | 135   | 135          | 91%        | 104  | 6   | 1   | 111   | 110          | 95%        | 0.03                  | -0.04-0.10 |
| Extramural spread depth given                         | 34  | 81   | 20  | 135   | 115          | 30%        | 86   | 23  | 2   | 111   | 109          | 79%        | 0.49                  | 0.37-0.59  |
| T sub stage                                           | 64  | 70   | 1   | 135   | 134          | 48%        | 96   | 15  | 0   | 111   | 111          | 86%        | 0.39                  | 0.27-0.48  |
| Description low rectal tumours                        | 19  | 45   | 71  | 135   | 64           | 30%        | 15   | 14  | 82  | 111   | 29           | 52%        | 0.22                  | 0.09-0.42  |
| Extramural invasion                                   | 45  | 90   | 0   | 135   | 135          | 33%        | 102  | 8   | 1   | 111   | 110          | 93%        | 0.59                  | 0.49-0.68  |
| Site of closest CRM                                   | 46  | 77   | 12  | 135   | 123          | 37%        | 79   | 29  | 3   | 111   | 108          | 73%        | 0.36                  | 0.23-0.47  |
| Tumour distance to CRM                                | 30  | 91   | 14  | 135   | 121          | 25%        | 65   | 40  | 6   | 111   | 105          | 62%        | 0.37                  | 0.24-0.48  |
| Peritoneal deposits                                   | 5   | 127  | 3   | 135   | 132          | 4%         | 92   | 19  | 0   | 111   | 111          | 83%        | 0.79                  | 0.70-0.85  |
| Pelvic side wall lymph nodes stated and characterised | 46  | 88   | 1   | 135   | 134          | 34%        | 107  | 4   | 0   | 111   | 111          | 96%        | 0.62                  | 0.52-0.70  |
| T substage N stage                                    | 80  | 55   | 0   | 135   | 135          | 59%        | 109  | 2   | 0   | 111   | 111          | 98%        | 0.39                  | 0.30-0.47  |
| CRM clear/involved                                    | 56  | 77   | 2   | 135   | 133          | 42%        | 98   | 13  | 0   | 111   | 111          | 88%        | 0.46                  | 0.35-0.56  |
| EMVI positive/negative                                | 35  | 100  | 0   | 135   | 135          | 26%        | 98   | 13  | 0   | 111   | 111          | 88%        | 0.62                  | 0.51-0.71  |
| Overall total                                         | 744 | 1156 | 125 | 2025  | 1900         | 39%        | 1370 | 194 | 101 | 1665  | 1564         | 88%        | 0.48                  | 0.46-0.51  |
